# Supplementary material
Source: publisher site journal article supplement (https://www.dovepress.com/article/570518)
Supplement: Supplementary file 1 [file 570518%20Supplementary%20Material.docx]

**Table S1:** Main information about the retrieved data on sleep disorder and perioperative stroke research during 1999-2024

| **Description** | **Results** |
| --- | --- |
| **MAIN INFORMATION ABOUT DATA** |  |
| Timespan | 1999:2024 |
| **SOURCES** |  |
| WoSCC | 295 |
| Scopus | 1515 |
| PubMed | 198 |
| **Total Documents** | **2,008** |
| **Removed before screening:** | **281** |
| Automation (n = 44)  Duplicates (n = 152)  Other reasons (n = 84)  Records excluded (n = 1) |  |
| **Documents** | **1727** |
| Annual Growth Rate % | 7.91 |
| Document Average Age | 8.43 |
| Average citations per doc | 69.53 |
| IQS | 3-34 |
| Median TC | 9.54 |
| References | 12066 |
| **DOCUMENT CONTENTS** |  |
| Keywords Plus (ID) | 14022 |
| Author's Keywords (DE) | 3721 |
| **AUTHORS** |  |
| Authors | 9643 |
| Authors of single-authored docs | 117 |
| **AUTHORS COLLABORATION** |  |
| Single-authored docs | 127 |
| Co-Authors per Doc | 7.93 |
| International co-authorships % | 14.15 |
| **DOCUMENT TYPES** |  |
| Article | 1,226 |
| Review | 501 |

Abbreviations: Web of Science Core Collection, IQS: Interquartile Spread, TC: Total Citations

**Appendix A: Search Strategies**

| Database | Search Strategy | Limits/Filters |
| --- | --- | --- |
| Web of Science (WoSCC) | TS = ((“sleep disorder*” OR insomnia OR “sleep apnea” OR OSA OR “circadian rhythm*”) AND (perioperative OR preoperative OR postoperative OR surgical OR surgery OR anesthesia OR anaesthesia) AND (stroke OR “cerebrovascular accident*” OR “cerebral infarction” OR “ischemic stroke” OR “hemorrhagic stroke” OR TIA OR “transient ischemic attack”)) | English; Article/Review; 1999–2024 |
| Scopus | TITLE-ABS-KEY((sleep OR “sleep OR insomnia OR "sleep disorder*" OR "sleep apnea" OR OSA OR "sleep disturbance*" OR "circadian rhythm*") AND (stroke OR "cerebrovascular" OR "brain infarction" OR "ischemic stroke" OR "hemorrhagic stroke" OR "TIA") AND (perioperative OR preoperative OR postoperative OR surgery OR surgical OR anesthesia OR anaesthesia OR anesthetic*)) AND ( DOCTYPE ( ar ) OR DOCTYPE ( re ) ) AND ( LANGUAGE ( english ) ) ) | English; Article/Review; 1999–2024 |
| PubMed | ( ("Sleep Disorders"[Mesh] OR "Sleep Apnea Syndromes"[Mesh] OR "Circadian Rhythm"[Mesh] OR sleep disorder*[tiab] OR insomnia[tiab] OR "sleep apnea"[tiab] OR OSA[tiab]) AND ("Perioperative Period"[Mesh] OR "Perioperative Care"[Mesh] OR surgery[tiab] OR surgical[tiab] OR anesthesia[tiab] OR operative[tiab]) AND ("Stroke"[Mesh] OR "Cerebral Infarction"[Mesh] OR stroke[tiab] OR "cerebrovascular accident"[tiab])) | English; Humans; Article/Review; 1999–2024 |

**PRISMA-S Supplement Text**

Search strategies were harmonized across Web of Science, Scopus, and PubMed, based on three concept blocks (sleep disorders, perioperative setting, and stroke). Syntax and indexing vocabularies (TS, TITLE-ABS-KEY, MeSH) were adapted for each database. Full strategies are presented above.

**Appendix B: Data Processing Workflow**

**1. Data Import Summary (Three Databases)**

**Web of Science (WoS)**

- Raw records: **295**
- Successfully imported using convert2df with rich metadata (71 fields including AU, AF, TI, PY, SO, C1, etc.).

**Scopus**

- Raw records: **1,515**
- Successfully imported using convert2df (58 fields, including AU, AF, TI, PY, SO).

**PubMed**

- Raw records: **198**
- Successfully imported using convert2df (68 fields).
- However, after automated cleaning, **0 records** remained (details below).

**2. Automatic Cleaning Results (auto_clean_biblio)**

To ensure consistency across data sources, a unified cleaning framework was applied to all retrieved records from Scopus, WOSCC, and PubMed. The following filtering rules were implemented:

1. Only English-language publications were retained.
2. Only Articles and Reviews were included; editorials, letters, meeting abstracts, notes, and non-scholarly items were excluded.
3. Records were required to contain non-empty Title (TI) and Author (AU) fields.
4. Duplicate entries across databases were removed.
5. Publication years (PY) were standardized as integers, and records beyond 2024 were removed to match the study timespan.

**Post-cleaning outcomes**

After applying the above criteria and performing cross-database deduplication, a total of 1,729 unique documents were retained for analysis (Table S1).

These documents were derived from:

- Scopus: 1,916 retrieved records
- WOSCC: 257 retrieved records
- PubMed: 194 retrieved records
- Duplicates removed: 161

The retained dataset spans 1999-2024, with an annual growth rate of 7.91%, an average citation count of 69.53 per document, and a total of 12,066 references.

This harmonized dataset (n = 1,729) served as the foundation for all subsequent bibliometric analyses.

**Appendix C: Computational and Model Fitting Procedures**

**1. Computational Environment**

• R version: 4.3.1
• Packages: bibliometrix 4.1.2, tidyverse, stringdist, ggplot2, igraph
• VOSviewer: 1.6.20
• CiteSpace: 6.2.R3 (Java SE 8)
• Scimago Graphica: 1.0.32
• Hardware: macOS Ventura / 32 GB RAM

**2. Data Preprocessing and Harmonization**

**2.1 Inclusion Rules**

• English language only
• Article and Review document types
• Required fields: Title (TI), Author (AU), Publication Year (PY)
• Excluded: Editorials, letters, abstracts, notes, book chapters

**2.2 Deduplication Workflow**

Step 1 — DOI matching (WOSCC > Scopus > PubMed priority)
Step 2 — Title–Year matching with fuzzy thresholds
Step 3 — Author-string similarity (Jaro–Winkler ≥ 0.90)
Outcome: 1,729 unique documents

**2.3 Author Disambiguation**

• Normalization to 'LastName, Initials'
• ORCID overrides string rules
• Affiliation-based distinction for identical initials

**2.4 Institutional Unification**

• Removal of department/division prefixes
• Standardization of university and hospital naming
• Manual curation for high-frequency institutions

**2.5 Keyword Thesaurus Construction**

• Merge spelling and lexical variants (e.g., 'cerebrovascular accident' → 'stroke')
• Review Scopus-only terms (frequency > 50 or ratio >10)

**3. Quantitative Modelling Procedures**

• Price’s Law: exponential growth modeling
• Lotka’s Law: MLE estimation with KS goodness-of-fit
• Bradford’s Law: Leimkuhler model implementation
• H-index computation for authors, institutions, and journals

**4. Network Construction Parameters**

• Co-authorship: full counting, minimum thresholds (authors 5, institutions 3, countries 2)
• Keyword co-occurrence: minimum occurrences = 5; association strength normalization
• Co-citation analysis: CiteSpace slicing (1999–2024), g-index k=25, Pathfinder pruning

**5. Clustering and Normalization**

• VOSviewer: Leiden clustering (resolution = 1.0)
• CiteSpace: LLR and MI for cluster labeling
• Thematic evolution (1999–2008, 2009–2016, 2017–2024)

**6. Sensitivity Analyses**

• Keyword thresholds tested: 3, 5, 8
• Author disambiguation thresholds: Jaro–Winkler 0.88–0.95
• Clustering resolution variants: 0.6, 1.0, 1.4
• Time-slice width: 1-year vs 2-year slices

**7. Reproducibility Statement**

All scripts used for preprocessing, harmonization, modelling, and visualization are available upon request. The workflow is fully reproducible on systems running R ≥ 4.2 and Java ≥ 8.
